# Supplementary material for: Elimination of Lymphatic Filariasis in The Gambia
Source: PubMed Central journal article supplement (PMC4364952; doi:10.1371/journal.pntd.0003642), 2015-03-18
Supplement: pntd.0003642.s002.pdf [file pntd.0003642.s002.pdf]

| NO | SCHOOL                     | LOCATION            | DISTRICT     | REGION | MALES | FEMALES | TOTAL SCREENED | REMARKS    | ENUMERATION UNIT NUMBER |
|----|----------------------------|---------------------|--------------|--------|-------|---------|----------------|------------|-------------------------|
| 1  | Nigeria International      | Old Jeshwang        | KMC          | WCR-1  | 10    | 7       | 17             | 05/07/2013 | EU 2                    |
| 2  | Babylon Day Care & Nursery | Daranka             | Kombo North  | WCR-1  | 38    | 67      | 105            | 14/06/2013 | EU 2                    |
| 3  | Star Preparatory School    | Pipeline            | KMC          | WCR-1  | 40    | 34      | 74             | 13/05/2013 | EU 2                    |
| 4  | Nemasu Nursery Madarassa   | Sukuta              | Kombo North  | WCR-1  | 22    | 25      | 47             | 14/05/2013 | EU 2                    |
| 5  | Kotu Preparatory           | Kotu                | KMC          | WCR-1  | 23    | 25      | 48             | 13/05/2013 | EU 2                    |
| 6  | Marent                     | Ebo Town            | KMC          | WCR-1  | 49    | 51      | 100            | 05/10/2013 | EU 2                    |
| 7  | Bintang Bolong             | Tallinding          | KMC          | WCR-1  | 15    | 20      | 35             | 05/02/2013 | EU 2                    |
| 8  | J.T.T. Gilipiti            | Tallinding          | KMC          | WCR-1  | 23    | 19      | 42             | 05/06/2013 | EU 2                    |
| 9  | Clunny Nursery             | Banjul              | Banjul       | WCR-1  | 48    | 63      | 111            | 05/08/2013 | EU 2                    |
| 10 | Sobeya                     | Tallinding          | KMC          | WCR-1  | 16    | 23      | 39             | 30/04/2013 | EU 2                    |
| 11 | Karin International        | Bundung             | KMC          | WCR-1  | 38    | 35      | 73             | 05/07/2013 | EU 2                    |
| 12 | Wisdom Nursery             | Serekunda           | KMC          | WCR-1  | 21    | 24      | 45             | 06/06/2013 | EU 2                    |
| 13 | Overcomers International   | Dippa Kunda         | KMC          | WCR-1  | 13    | 17      | 30             | 05/07/2013 | EU 2                    |
| 14 | Ellis Demaro               | Bakoteh             | KMC          | WCR-1  | 21    | 18      | 39             | 13/05/2013 | EU 2                    |
| 15 | D. Harris International    | Manjai              | KMC          | WCR-1  | 14    | 14      | 28             | 05/07/2013 | EU 2                    |
| 16 | Jahanka                    | Jahanka             | Fulladu West | CRR    | 21    | 27      | 48             | 19/06/2013 | EU 2                    |
| 17 | Sofaniama                  | Katamina            | Niamina      | CRR    | 26    | 23      | 49             | 18/06/2013 | EU 2                    |
| 18 | Jahan Annex                |                     | Fulladu West | CRR    | 15    | 38      | 53             | 18/06/2013 | EU 2                    |
| 19 | Kerewan Samba Sira         | K. Samba Sira       | Lower Saloum | CRR    | 39    | 58      | 97             | 17/06/2013 | EU 2                    |
| 20 | Sare Luba                  | Sare Luba           | Fulladu West | CRR    | 12    | 15      | 27             | 17/06/2013 | EU 2                    |
| 21 | Brikama -Ba                | Brikamaba           | Fulladu West | CRR    | 40    | 40      | 80             | 17/06/2013 | EU 2                    |
| 22 | Kerewan Dumbokono          | Kerewan Dumbo       | Fulladu West | CRR    | 8     | 15      | 23             | 18/06/2013 | EU 2                    |
| 23 | Barajally Suba             | Barajally Suba      | Niani        | CRR    | 29    | 24      | 53             | 17/06/2013 | EU 2                    |
| 24 | Dodo                       | Dodo                | Sami         | CRR    | 17    | 36      | 53             | 17/06/2013 | EU 2                    |
| 25 | Ballagharr Kerr Ndery      | Ballanghar K. Ndery | Lower Saloum | CRR    | 15    | 38      | 53             | 18/06/2013 | EU 2                    |
| 26 | Mamut Fana                 | Mamut Fana          | Niani        | CRR    | 28    | 42      | 70             | 18/06/2013 | EU 2                    |
| 27 | Kataba Abdou Ndow          | Kataba Abdou Ndow   | Niani        | CRR    | 19    | 34      | 53             | 17/06/2013 | EU 2                    |
| 28 | Pallol Wollof (Pallang)    | Pallol Wollof       | Lower Saloum | CRR    | 33    | 26      | 59             | 18/06/2013 | EU 2                    |
| 29 | Kerr Auldi                 | Kerr Auldi          | Lower Saloum | CRR    | 26    | 27      | 53             | 18/06/2013 | EU 2                    |
| 30 | Baati Ndarr                | Baati Ndarr         | Upper Saloum | CRR    | 22    | 38      | 60             | 18/06/2013 | EU 2                    |
| 31 | St James Nursery School    | Siffoe              | Kombo South  | WCR-2  | 11    | 12      | 23             | 06/06/2013 | Eu 1                    |

|    |                                  |                 |               |       |    |    |     |            |      |
|----|----------------------------------|-----------------|---------------|-------|----|----|-----|------------|------|
| 32 | St. Bernadet Nursery             | Mayok           | Foni Bintang  | WCR-2 | 16 | 33 | 49  | 16/05/2013 | EU 1 |
| 33 | Grace Nursery/Kaimo              | Kaimo           | Foni Bintang  | WCR-2 | 31 | 29 | 60  | 17/05/2013 | EU 1 |
| 34 | Katakorr Nursery                 | Karakorr        | Foni Bintang  | WCR-2 | 22 | 25 | 47  | 17/05/2013 | EU 1 |
| 35 | Fresh Start Foundation           | Brikama Misera  | Kombo Central | WCR-2 | 21 | 29 | 50  |            | EU 1 |
| 36 | Aja Asombi Bojang Nursery School | Kanilai         | Foni Kansala  | WCR-2 | 30 | 25 | 55  | 16/05/2013 | EU 1 |
| 37 | Dumbuto                          | Dumbuto         | Kiang West    | LRR   | 17 | 18 | 35  | 06/06/2013 | EU 1 |
| 38 | Jissay (Manduar)                 | Jissay          | Kiang West    | LRR   | 25 | 18 | 43  | 06/05/2013 | EU 1 |
| 39 | Tankular                         | Tankular        | Kiang West    | LRR   | 20 | 12 | 32  | 06/05/2013 | EU 1 |
| 40 | Massembeh                        | Massembe        | Kiang West    | LRR   | 14 | 12 | 26  | 06/06/2013 | EU 1 |
| 41 | Madina Angalleh                  | Madina Angalleh | Kiang West    | LRR   | 30 | 28 | 58  | 06/06/2013 | EU 1 |
| 42 | Nema ABC                         | Nema            | Kiang Central | LRR   | 60 | 51 | 111 | 06/06/2013 | EU 1 |
| 43 | Kerr Ngorr                       | Kerr Ngorr      | Jokadou       | NBWR  | 31 | 19 | 50  | 06/05/2013 | EU 1 |
| 44 | Kerr Amadou                      | Kerr Amadou     | Jokadou       | NBWR  | 23 | 27 | 50  | 06/12/2013 | EU 1 |
| 45 | Kerr Alhagie Malick              | Kerr Alhagie    | Jokadou       | NBWR  | 29 | 35 | 64  | 06/04/2013 | EU 1 |
| 46 | Daru Fodayba                     | Daru Fodayba    | Jokadou       | NBWR  | 30 | 23 | 53  | 06/12/2013 | EU 1 |
| 47 | Aljamdu                          | Aljambu         | U/Niumi       | NBWR  | 22 | 30 | 52  | 06/03/2013 | EU 1 |
| 48 | Kerr Mamma                       | Kerr Mamma      | U/Niumi       | NBWR  | 59 | 23 | 82  | 06/03/2013 | EU 1 |
| 49 | Saaba                            | Saaba           | L/Badibou     | NBER  | 30 | 23 | 53  | 06/11/2013 | EU 1 |
| 50 | Kinteh Kunda Annex               | Kinteh Kunda    | L/Badibou     | NBER  | 23 | 30 | 53  | 06/10/2013 | EU 1 |
| 51 | Banni Nursery Annex              | Banni           | L/Badibou     | NBER  | 22 | 31 | 53  | 06/11/2013 | EU 1 |
| 52 | Sen Jons                         |                 | U/Badibou     | NBER  | 21 | 29 | 50  | 06/10/2013 | EU 1 |
| 53 | Farafenni Proper Nursery Annex   | Farafenni       | U/Badibou     | NBER  | 19 | 34 | 53  | 06/12/2013 | EU 1 |
| 54 | Makka Farafenni Nursery Annex    | Farafenni       | U/Badibou     | NBER  | 25 | 25 | 50  | 06/10/2013 | EU 1 |
| 55 | Khalid Bun Walid (Garawol)       | Garawol         | Kantora       | URR   | 24 | 11 | 35  | 06/12/2013 | EU 1 |
| 56 | Baniko Ismaila                   | Baniko          | Fulladu East  | URR   | 12 | 30 | 42  | 13/06/2013 | EU 1 |
| 57 | Sare Alpha (LBS)                 | Sare Alpha      | Kantora       | URR   | 28 | 24 | 52  | 06/12/2013 | EU 1 |
| 58 | Nawdeh                           | Nawdeh          | Sandu         | URR   | 15 | 20 | 35  | 06/11/2013 | EU 1 |
| 59 | Basse SOS Nursery                | Basse           | Fulladu East  | URR   | 31 | 21 | 52  | 06/10/2013 | EU 1 |
| 60 | Song Kunda                       | Song Kunda      | Kantora       | URR   | 14 | 9  | 23  | 06/12/2013 | EU 1 |
| 61 | Makamasereh                      | Makamasireh     | Wulli         | URR   | 13 | 12 | 25  | 06/11/2013 | EU 1 |
